# Supplementary material for: Uranium biomineralization induced by a metal tolerantSerratiastrain under acid, alkaline and irradiated conditions
Source: Royal Society of Chemistry journal article supplement (doi:10.1039/c8mt00061a), 2018-01-01

**Figure S1:** Effect of phosphatase inhibitors on uranium removal by *Serratia* cells at pH 9. Bioprecipitation assays were conducted using *Serratia* cells equivalent to OD<sub>600 nm</sub> ~ 2/mL with β- GP as substrate (5 mM) and U (1 mM) added as uranyl carbonate in absence and presence of phosphatase inhibitors (10 mM sodium orthovanadate and 5 mM sodium pyrophosphate). Concentrations of uranium were measured as a function of time.

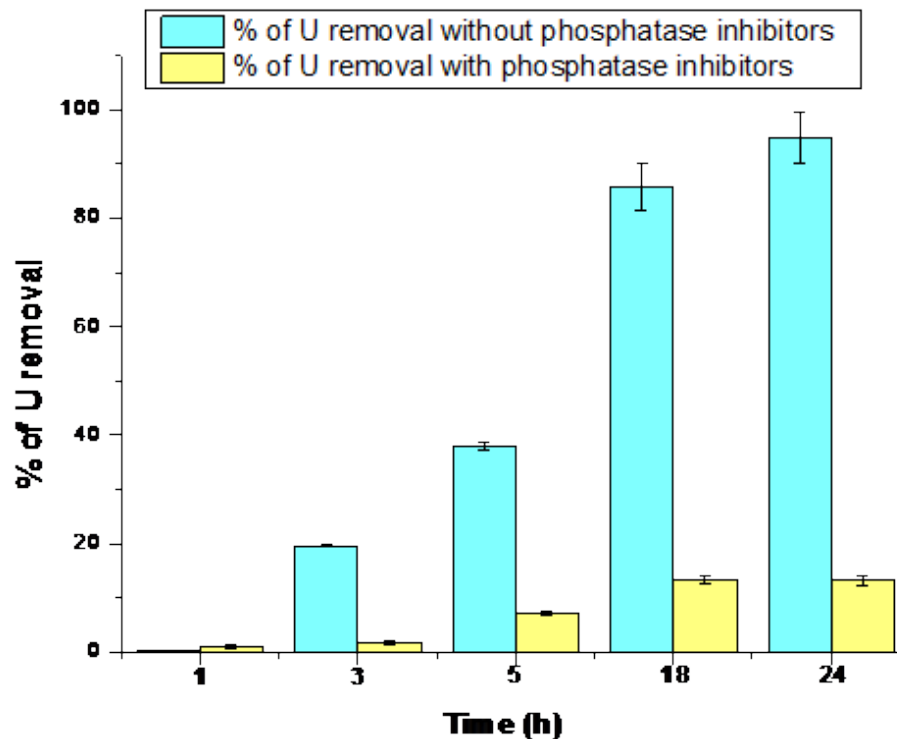

Supplement: c8mt00061a1.pdf [file c8mt00061a1.pdf]
