# Supplementary material for: Uranium biomineralization induced by a metal tolerantSerratiastrain under acid, alkaline and irradiated conditions
Source: Royal Society of Chemistry journal article supplement (doi:10.1039/c8mt00061a), 2018-01-01

**Figure S2: Viability and DNA damage in *Serratia* cells exposed to gamma radiation.** (A) Radiation tolerance of *Serratia* sp. strain OT II 7. Exponential phase cells ( $OD_{600\text{ nm}}$  of 1.0) were exposed to gamma radiation from  $^{60}\text{Co}$  source. Volumes of 10  $\mu\text{L}$  from a dilution series of the irradiated cell cultures were spotted onto LB agar plates and incubated under usual growth conditions. The cells showed tolerance up to 1.6 kGy  $^{60}\text{Co}$ -gamma rays. (B) Evaluation of *in vivo* and *in vitro* chromosomal DNA damage following exposure to 800 Gy of gamma radiation. Lane 1: Chromosomal DNA (1  $\mu\text{g}$ ) of unirradiated cells, Lane 2: Chromosomal DNA (1  $\mu\text{g}$ ) of cells irradiated at 800 Gy. DNA samples were electrophoretically resolved on 0.8% agarose gel at 80 V for  $\sim 3$  h along with lambda DNA/*BstE* II marker (M).

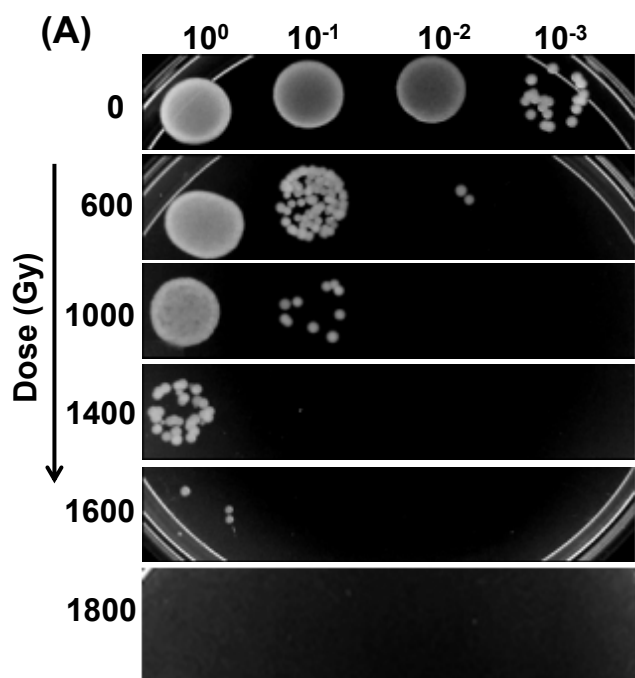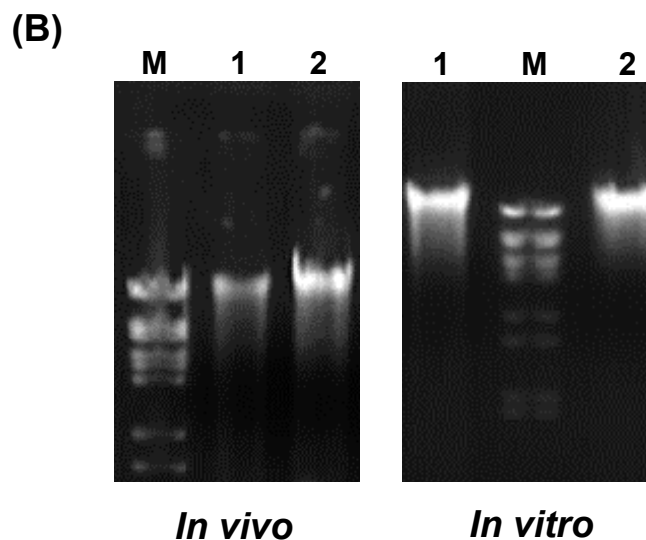

Supplement: c8mt00061a2.pdf [file c8mt00061a2.pdf]
