# Supplementary material for: Uranium biomineralization induced by a metal tolerantSerratiastrain under acid, alkaline and irradiated conditions
Source: Royal Society of Chemistry journal article supplement (doi:10.1039/c8mt00061a), 2018-01-01
Supplement: c8mt00061a3.pdf [file c8mt00061a3.pdf]

Table S1: Phosphatase activity at pH 5, 7 and 9 (pNP liberated in nmoles/min) in absence and presence of uranium

| pH 5     |              |              | pH 7     |              |              | pH 9       |            |
|----------|--------------|--------------|----------|--------------|--------------|------------|------------|
| Time (h) | Control      | U treated    | Time (h) | Control      | U treated    | Control    | U treated  |
| 0        | 5.01 ± 0.251 | 4.04 ± 0.202 | 0        | 0.74 ± 0.037 | 0.64 ± 0.032 | 0.57±0.029 | 0.75±.046  |
| 10       | 5.71 ± 0.286 | 1.11 ± 0.555 | 24       | 0.75 ± 0.037 | 0.76 ± 0.038 | 0.53±0.027 | 0.66±0.033 |
| 24       | 4.75 ± 0.238 | 0.37 ± 0.019 | 48       | 0.75 ± 0.037 | 0.65 ± 0.027 | 0.64±0.032 | 0.72±0.041 |
| 48       | 4.20 ± 0.21  | 0.13 ± 0.007 | 72       | 0.69 ± 0.035 | 0.63 ± 0.032 | 0.61±0.031 | 0.70±0.036 |
| 120      | 4.91 ± 0.246 | 0.16 ± 0.009 | 120      | 0.71 ± 0.036 | 0.67 ± 0.034 | 0.65±0.033 | 0.69±0.035 |
