# Supplementary material for: Uranium biomineralization induced by a metal tolerantSerratiastrain under acid, alkaline and irradiated conditions
Source: Royal Society of Chemistry journal article supplement (doi:10.1039/c8mt00061a), 2018-01-01
Supplement: c8mt00061a4.pdf [file c8mt00061a4.pdf]

**Table S2: Comparison of uranium bioprecipitation ability of *Serratia* sp. strain OT II 7 with other reported bacterial strains**

| Strains                | pH conditions for precipitation | Specific phosphatase activity (nmoles/min/mg of protein) | Time (h) require to remove >90% of input U | Amount of U* precipitated (g U / g of dry biomass) | Reference  |
|------------------------|---------------------------------|----------------------------------------------------------|--------------------------------------------|----------------------------------------------------|------------|
| <i>Citrobacter N14</i> | 7.0                             | ~ 400                                                    | 16-18                                      | 0.09                                               | 22         |
| <i>Deino-PhoN</i>      | 6.8                             | ~ 170                                                    | 8-9                                        | 0.35                                               | 26,41      |
| <i>Sphingomonas</i>    | 9.0                             | ~ 500                                                    | 6-7                                        | 0.30                                               | 27         |
| <i>Deino-PhoK</i>      | 9.0                             | ~ 15,000                                                 | < 2                                        | 1.07                                               | 38         |
| <i>Serratia</i>        | 5.0                             | ~ 151                                                    | 120                                        | 0.23                                               | This study |
| <i>Serratia</i>        | 7.0                             | ~ 30                                                     | 18-20                                      | 0.36                                               | This study |
| <i>Serratia</i>        | 9.0                             | ~ 20                                                     | 18-20                                      | 0.37                                               | This study |

\* Input uranium concentration at 1 mM
